# Supplementary material for: Use of Modified Clostridium perfringens Enterotoxin Fragments for Claudin Targeting in Liver and Skin Cells
Source: MDPI journal article supplement (doi:10.3390/ijms20194774), 2019-09-26
Supplement: s1 [file s1]

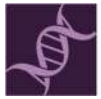

1 Supplementary Materials:

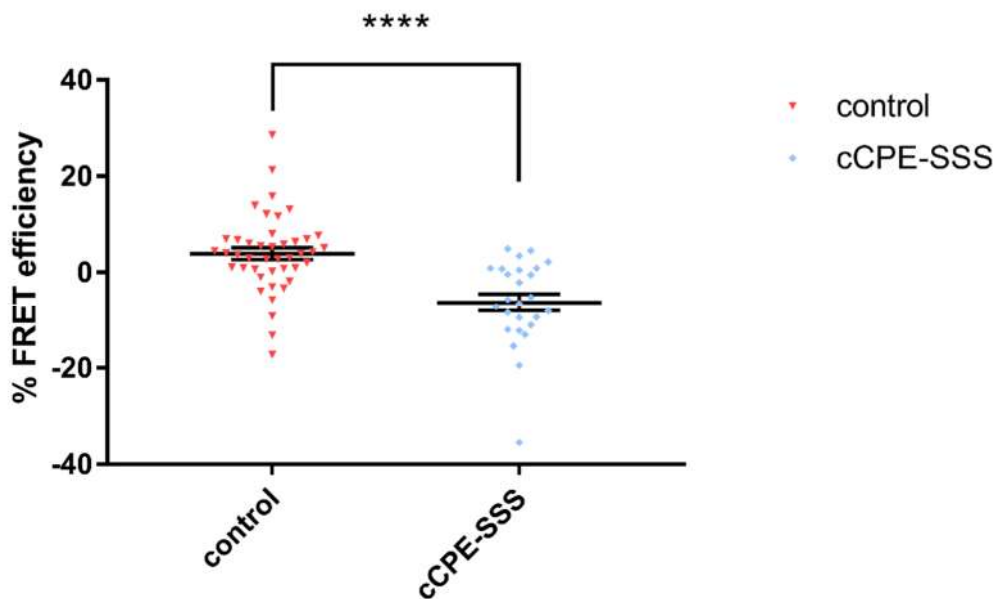

2  
3 **Figure S1 cCPE-SSS interferes with Cldn1-CD81 interaction.** HEK-293 cells were co-transfected with cyan  
4 fluorescent protein-fused Cldn1 and yellow fluorescent protein-fused CD81. Cells were incubated with 10  $\mu\text{g/ml}$   
5 cCPE-SSS for 30 min at 37  $^{\circ}\text{C}$  prior to FRET measurements. Control was not treated. Cldn1-CD-81 interaction  
6 was quantified with the FRET acceptor photo bleaching method. Negative FRET efficiency might result from  
7 CFP donor bleaching. Results are shown as means  $\pm$  SEM. Statistical significance of Mann-Whitney test: \*\*\*\*  
8  $p < 0.0001$ . control:  $n = 43$ , cCPE-SSS:  $n = 26$ , two independent experiments.

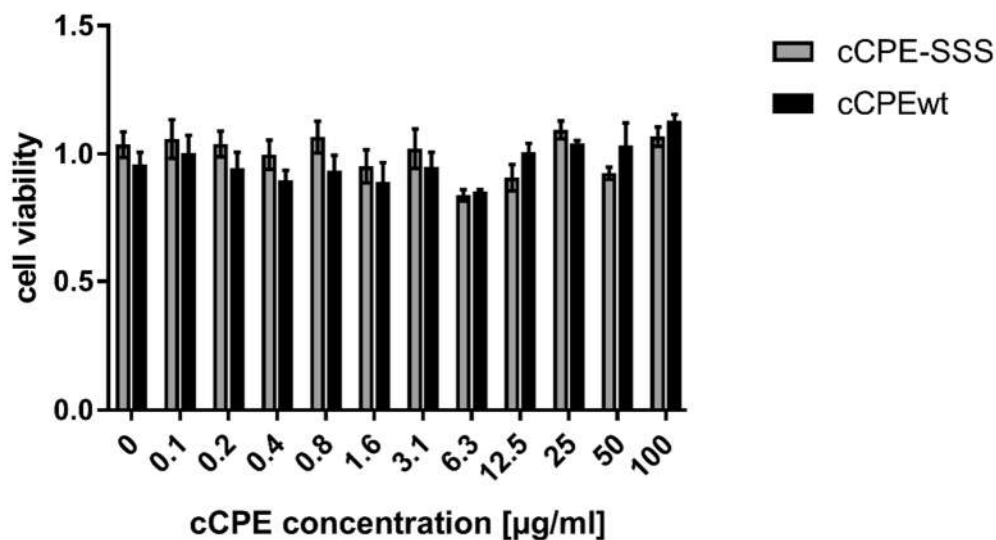

9  
10 **Figure S2 cCPE-SSS treatment has no adverse effect on viability of Huh7.5 cells compared to cCPEwt.** Huh7.5  
11 cells were seeded in 96 well plate, cultivated for 72 h and treated with cCPEwt or -SSS for 2 h. MTS reagent was  
12 added for 3 h (37  $^{\circ}\text{C}$ , 5%  $\text{CO}_2$ ) and absorbance was measured at 490 nm. Cell viability is directly proportional to  
13 absorbance at 490 nm. Student's t-test showed that the viabilities of the two treatment groups were not  
14 significantly different at any concentration.  $n = 3$ .
